# Supplementary material for: Phytotoxicity and anti-phytopathogenic activities of marine-derived fungi and their secondary metabolites
Source: PubMed Central journal article supplement — RSC Adv. 2018 Nov 8;8(66):37573–80. doi: 10.1039/c8ra08047j (PMC9089327; doi:10.1039/c8ra08047j), 2018-11-08
Supplement: RA-008-C8RA08047J-s001.pdf [file RA-008-C8RA08047J-s001.pdf]

## *Supplementary Information*

### **Phytotoxicity and Anti-Phytopathogenic Activities of Marine-Derived Fungi and Their Secondary Metabolites**

Rui-Huan Huang<sup>‡a</sup>, Jian-Yu Gou<sup>‡b</sup>, Dong-Lin Zhao<sup>\*a</sup>, Dan Wang<sup>a</sup>, Jing Liu<sup>b</sup>, Guo-Yong Ma<sup>b</sup>, Yi-Qiang Li<sup>a</sup> and Cheng-Sheng Zhang<sup>\*a</sup>

<sup>a</sup> Marine Agricultural Research Center, Tobacco Research Institute of Chinese Academy of Agricultural Sciences, Qingdao 266101, People's Republic of China.

<sup>b</sup> Zunyi Branch, Guizhou Tobacco Company, Zunyi 563000, China

\* To whom correspondence should be addressed. Tel: 86-532-88702115. E-mail: zhaodonglin@caas.cn (D.-L.Z); zhchengsheng@126.com (C.-S.Z).

‡ These authors contributed equally to this work.

---

## List of Supporting Information

**Table S1.** Identification and phylogenetic affiliations of the isolated marine-derived fungal strains.

**Table S2.** Antifungal activity against spore germination of the marine-derived fungal extracts (10.0 mg/mL).

**Table S3.** Antifungal activity against mycelial growth (10.0 mg/mL) of plant pathogenic fungi.

**Table S4.** Antibacterial activity of the marine-derived fungal extracts.

**Figure S1.** The sources of the isolate marine-derived fungal strains

**Figure S2.**  $^1\text{H}$  NMR (500 MHz,  $\text{DMSO-}d_6$ ) spectrum of compound **1**

**Figure S3.**  $^{13}\text{C}$  NMR (125 MHz,  $\text{DMSO-}d_6$ ) spectrum of compound **1**

**Figure S4.** HMQC ( $\text{DMSO-}d_6$ ) spectrum of compound **1**

**Figure S5.** COSY ( $\text{DMSO-}d_6$ ) spectrum of compound **1**

**Figure S6.** HMBC ( $\text{DMSO-}d_6$ ) spectrum of compound **1**

**Figure S7.** 1D NOE ( $\text{DMSO-}d_6$ ) spectrum of compound **1**

**Figure S8.** HRESIMS spectrum of compound **1**

**Table S1.** Identification and phylogenetic affiliations of the isolated marine-derived fungal strains.

| Strain | Closest identified relative         | Accession number | Similarity (%) | Seq.Length (bp) | Overlap (bp) |
|--------|-------------------------------------|------------------|----------------|-----------------|--------------|
| D1     | <i>Penicillium oxalicum</i>         | MF961796         | 100%           | 565             | 565          |
| D2     | <i>Penicillium sclerotiorum</i>     | MG827186         | 100%           | 552             | 552          |
| D3     | <i>Fusarium solani</i>              | MG827183         | 100%           | 534             | 534          |
| D4     | <i>Paraconiothyrium brasiliense</i> | MG827175         | 99%            | 583             | 581          |
| D5     | <i>Aspergillus versicolor</i>       | MG827180         | 99%            | 564             | 555          |
| D6     | <i>Paecilomyces formosus</i>        | MG827161         | 99%            | 616             | 605          |
| D7     | <i>Poitrasia circinans</i>          | MG827156         | 100%           | 633             | 603          |
| D8     | <i>Paracamarosporium hawaiiense</i> | MG827189         | 99%            | 562             | 549          |
| D9     | <i>Pestalotiopsis microspora</i>    | MG827171         | 100%           | 521             | 521          |
| D10    | <i>Talaromyces ohiensis</i>         | MG827176         | 99%            | 569             | 564          |
| D11    | <i>Phoma</i> sp.                    | MG827157         | 100%           | 505             | 502          |
| D12    | <i>Trichoderma hamatum</i>          | MG827166         | 98%            | 666             | 653          |
| D13    | <i>Trichoderma harzianum</i>        | MG827165         | 100%           | 590             | 590          |
| D14    | <i>Trichoderma asperellum</i>       | MG827162         | 100%           | 581             | 581          |
| D15    | <i>Talaromyces flavus</i>           | MG827177         | 99%            | 553             | 553          |
| D16    | <i>Phomopsis</i> sp.                | MG827160         | 99%            | 548             | 548          |
| D17    | <i>Aspergillus fumigatus</i>        | MG827158         | 100%           | 571             | 571          |
| D18    | <i>Colletotrichum siamense</i>      | MF961799         | 99%            | 544             | 544          |
| D19    | <i>Trichoderma virens</i>           | MG827167         | 99%            | 602             | 601          |
| D20    | <i>Aspergillus</i> sp.              | MF961797         | 100%           | 577             | 577          |
| D21    | <i>Talaromyces allahabadensis</i>   | MG827185         | 100%           | 546             | 526          |
| D22    | <i>Lasiodiplodia theobromae</i>     | MF961794         | 100%           | 516             | 516          |
| D23    | <i>Neofusicoccum mangiferae</i>     | MF961790         | 100%           | 558             | 558          |
| D24    | <i>Sarocladium kiliense</i>         | MG827178         | 100%           | 548             | 548          |
| D25    | <i>Fusarium</i> sp.                 | MG827190         | 99%            | 694             | 566          |
| D26    | <i>Penicillium oxalicum</i>         | MF961791         | 99%            | 558             | 558          |
| D27    | <i>Fusarium solani</i>              | MG827169         | 100%           | 536             | 536          |
| D28    | <i>Pleosporales</i> sp.             | MG827187         | 97%            | 520             | 517          |
| D29    | <i>Paecilomyces</i> sp.             | MG827159         | 99%            | 613             | 605          |
| D30    | <i>Pestalotiopsis</i> sp.           | MG827173         | 99%            | 585             | 584          |
| D31    | <i>Penicillium</i> sp.              | MG827172         | 99%            | 591             | 584          |
| D32    | <i>Paracamarosporium hawaiiense</i> | MG827181         | 99%            | 554             | 546          |
| D33    | <i>Penicillium citrinum</i>         | MF961792         | 99%            | 537             | 532          |
| D34    | <i>Clonostachys rosea</i>           | MG827170         | 99%            | 540             | 540          |
| D35    | <i>Talaromyces columbinus</i>       | MG827174         | 100%           | 561             | 561          |
| D36    | <i>Volutella</i> sp.                | MG827191         | 98%            | 564             | 557          |
| D37    | <i>Pleosporales</i> sp.             | MG827179         | 99%            | 529             | 528          |

**Table S2.** Antifungal activity against spore germination of the marine-derived fungal extracts (10.0 mg/mL).

| Strains | <i>A. alternata</i> | <i>A. brassicicola</i> | <i>A. niger</i> | <i>P. theae</i> |
|---------|---------------------|------------------------|-----------------|-----------------|
| D1      | +                   | +++                    | -               | -               |
| D2      | -                   | +                      | -               | -               |
| D5      | -                   | +                      | -               | -               |
| D9      | +                   | -                      | -               | -               |
| D12     | +                   | +++                    | +++             | -               |
| D14     | +                   | +                      | +++             | +               |
| D21     | +                   | ++                     | -               | -               |
| D26     | -                   | +++                    | -               | -               |
| D27     | +++                 | +++                    | +++             | -               |

- no antifungal activity; + weak antifungal activity (5 mm < inhibition zone < 10 mm); ++ moderate antifungal activity (10 mm < inhibition zone < 15 mm); +++ strong antifungal activity (inhibition zone > 15 mm).

**Table S3.** Antifungal activity against mycelial growth (10.0 mg/mL) of plant pathogenic fungi.

| Strains | <i>A. alternata</i> | <i>A. brassicicola</i> | <i>D. medusaea</i> | <i>P. theae</i> |
|---------|---------------------|------------------------|--------------------|-----------------|
| D1      | -                   | +++                    | ++                 | -               |
| D2      | -                   | -                      | +                  | +               |
| D5      | -                   | ++                     | -                  | -               |
| D12     | -                   | -                      | ++                 | ++              |
| D13     | -                   | -                      | +                  | -               |
| D14     | -                   | -                      | +                  | ++              |
| D21     | +                   | -                      | +                  | -               |
| D26     | -                   | +                      | -                  | -               |
| D27     | -                   | -                      | ++                 | -               |
| P8      | -                   | +                      | +                  | -               |

- no obvious antifungal activity (inhibition rate <50%); + weak antifungal activity (50% < inhibition rate <70%); ++ moderate antifungal activity (70% < inhibition rate <90%); +++ strong antifungal activity (inhibition rate > 90%).

**Table S4.** Antibacterial activity of the marine-derived fungal extracts.

| Strains | Concentration (10.0 mg/mL) |                    |                        | Concentration (1.0 |                    |
|---------|----------------------------|--------------------|------------------------|--------------------|--------------------|
|         | <i>A. avenae</i>           | <i>P. syringae</i> | <i>R. solanacearum</i> | <i>A. avenae</i>   | <i>P. syringae</i> |
| D1      | +++                        | +++                | -                      | ++                 | +++                |
| D2      | -                          | +                  | -                      | -                  | -                  |
| D7      | +                          | -                  | -                      | -                  | -                  |
| D9      | -                          | ++                 | -                      | -                  | -                  |
| D12     | -                          | +                  | ++                     | -                  | -                  |
| D13     | -                          | -                  | ++                     | -                  | -                  |
| D14     | -                          | +                  | +++                    | -                  | -                  |
| D19     | -                          | ++                 | -                      | -                  | -                  |
| D20     | +                          | +                  | -                      | -                  | -                  |
| D21     | +++                        | +++                | -                      | +++                | +++                |
| D22     | +                          | -                  | -                      | -                  | -                  |
| D26     | -                          | +++                | -                      | -                  | +++                |
| D34     | -                          | ++                 | -                      | -                  | -                  |
| D35     | -                          | +                  | -                      | -                  | -                  |

- no antibacterial activity; + weak inhibitory activity (inhibition zone between 5 mm and 10 mm); ++ moderate inhibitory activity (inhibition zone between 10 mm and 15 mm); +++ strong inhibitory activity (inhibition zone > 15 mm).

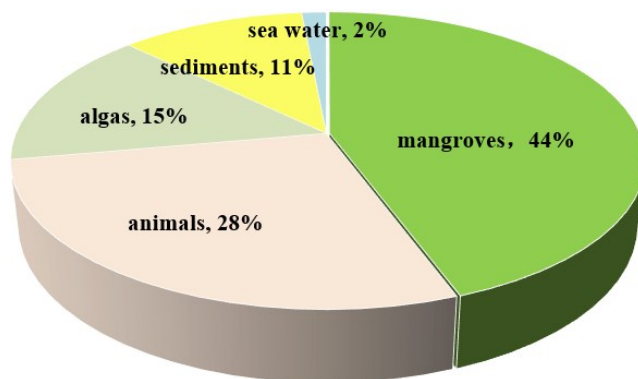

**Figure S1.** The sources of the isolate marine-derived fungal strains

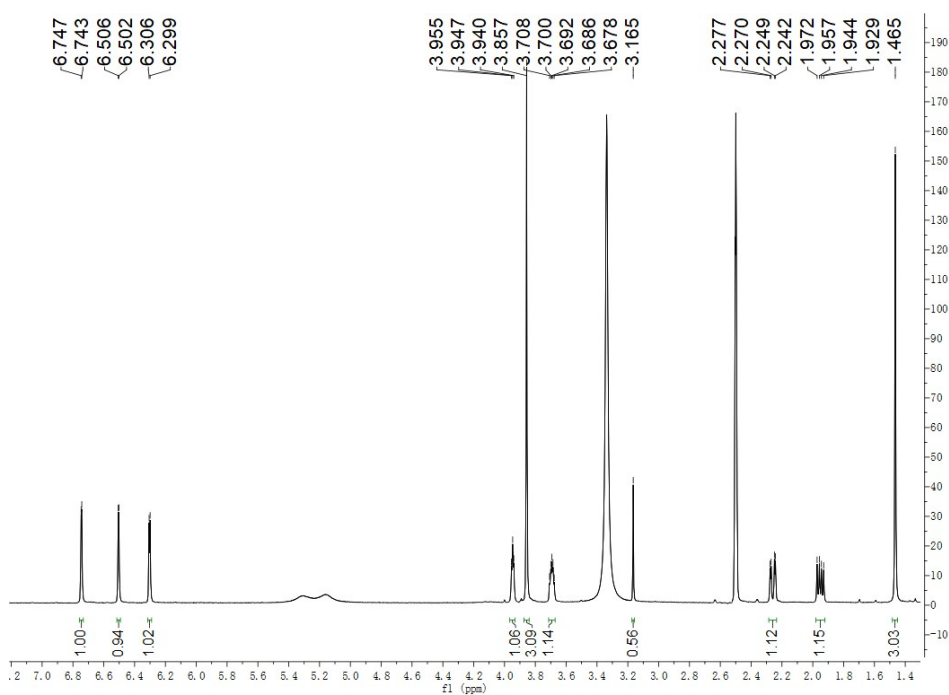

**Figure S2.** <sup>1</sup>H NMR (500 MHz, DMSO-*d*<sub>6</sub>) spectrum of compound **1**

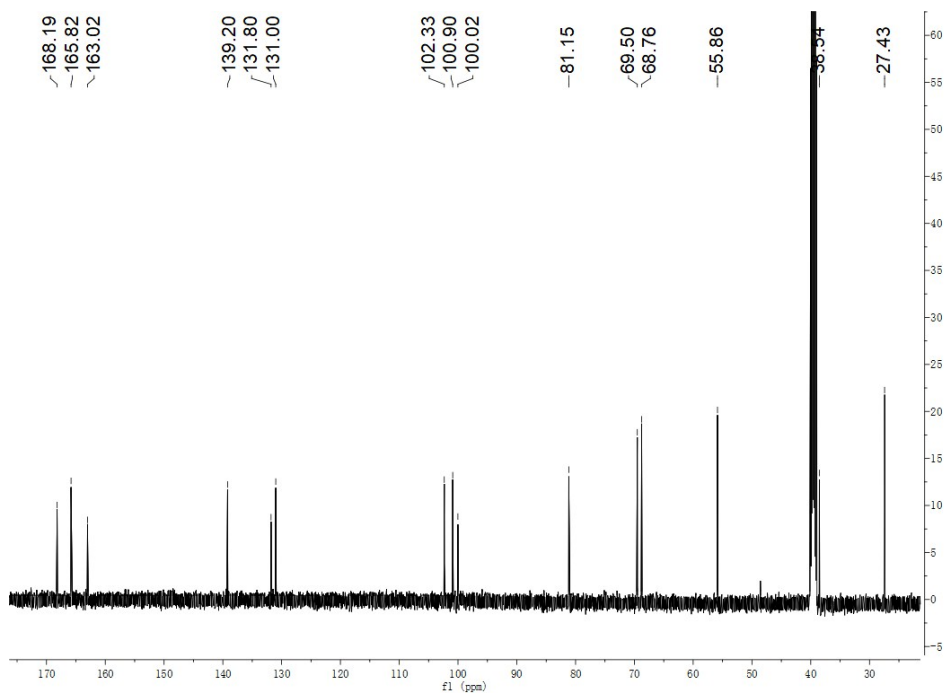

**Figure S3.**  $^{13}\text{C}$  NMR (125 MHz,  $\text{DMSO-}d_6$ ) spectrum of compound **1**

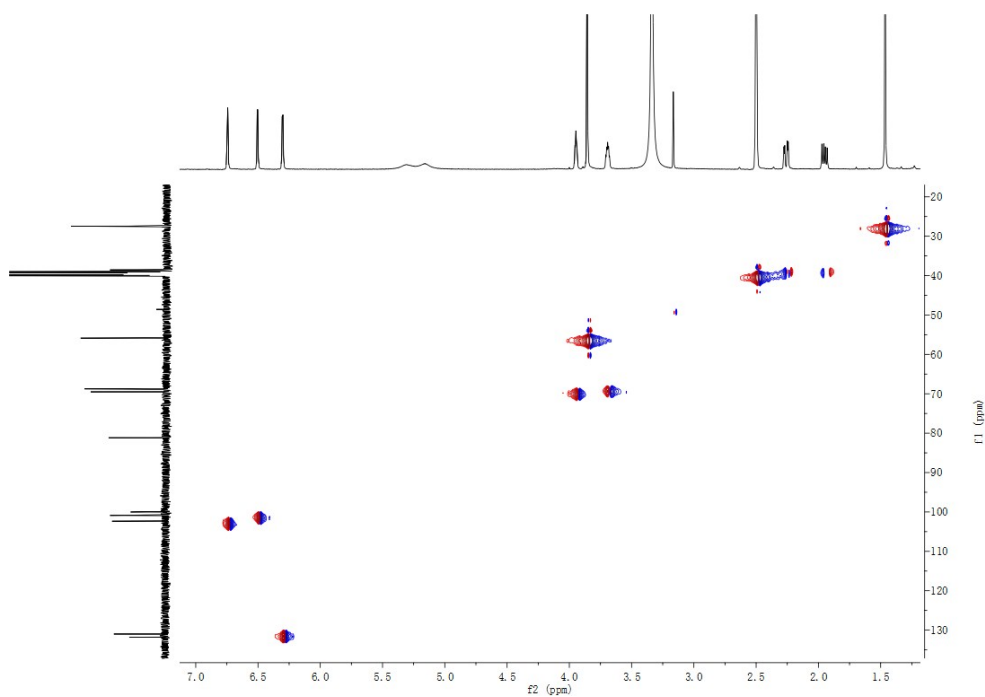

**Figure S4.** HMBC ( $\text{DMSO-}d_6$ ) spectrum of compound **1**

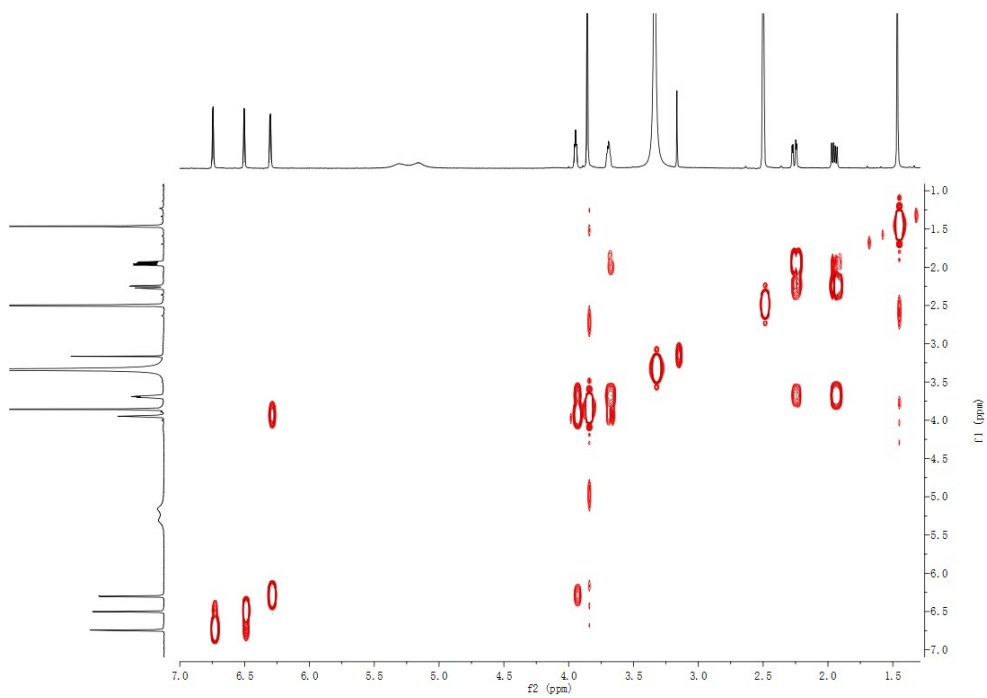

**Figure S5.** COSY (DMSO-*d*<sub>6</sub>) spectrum of compound **1**

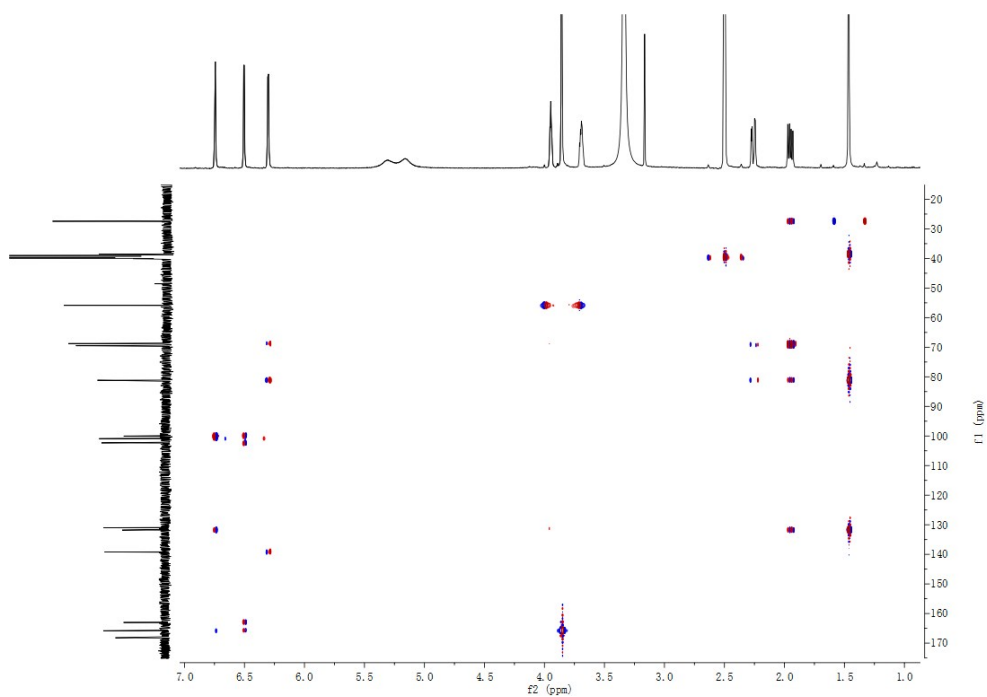

**Figure S6.** HMBC (DMSO-*d*<sub>6</sub>) spectrum of compound **1**



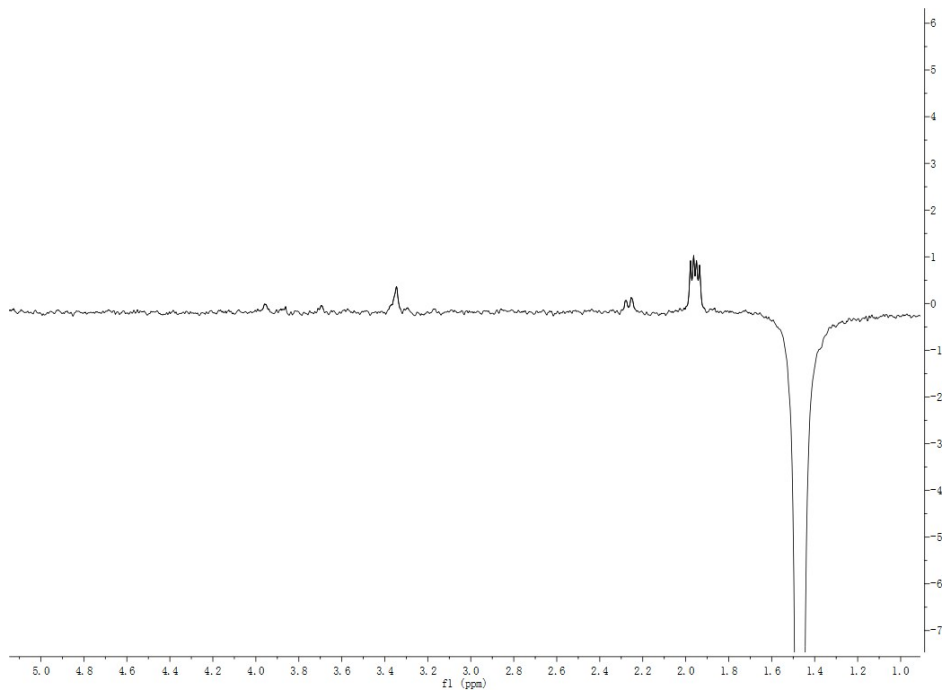

**Figure S7.** 1D NOE (DMSO- $d_6$ ) spectrum of compound **1**

20180418-W44314\_180418090128 #15 RT: 0.22 AV: 1 NL: 9.91E5  
T: FTMS - p ESI Full ms [100.00-2000.00]

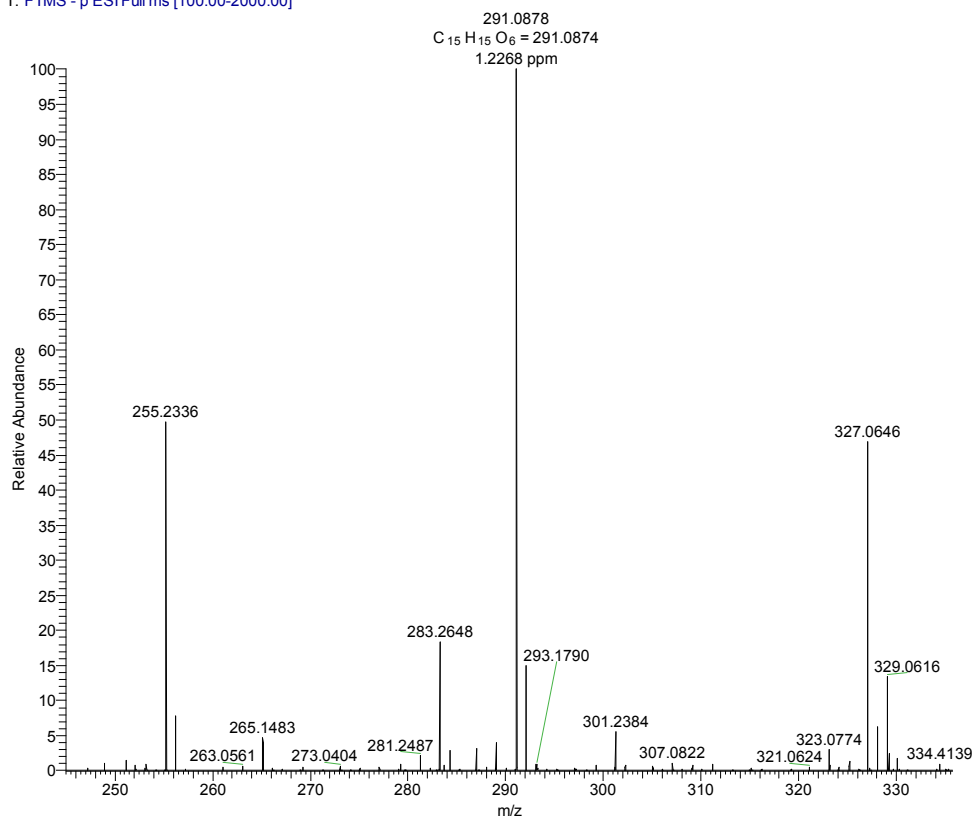

**Figure S8.** HRESIMS spectrum of compound **1**
